# Supplementary material for: An ultrafine V2O3 modified hierarchical porous carbon microsphere as a high performance cathode matrix for lithium–sulfur batteries
Source: Royal Society of Chemistry journal article supplement (doi:10.1039/c6ra12687a), 2016-01-01
Supplement: c6ra12687a1.pdf [file c6ra12687a1.pdf]

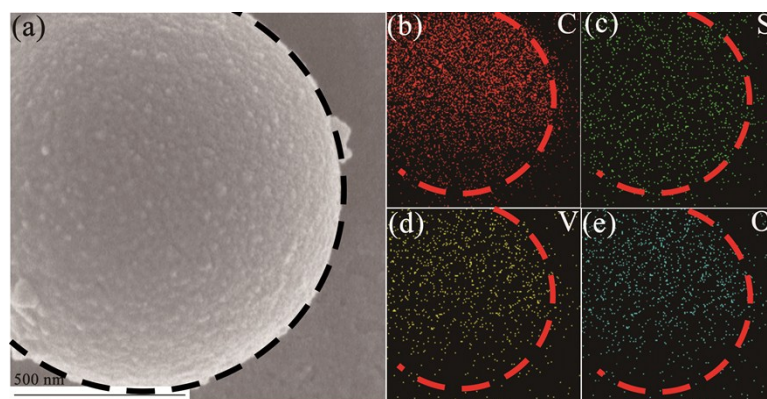

**Fig. S1.** SEM image of (a) S/VCM, EDX mappings of S/VCM: (b) C, (c) S, (d) V and (e) O.

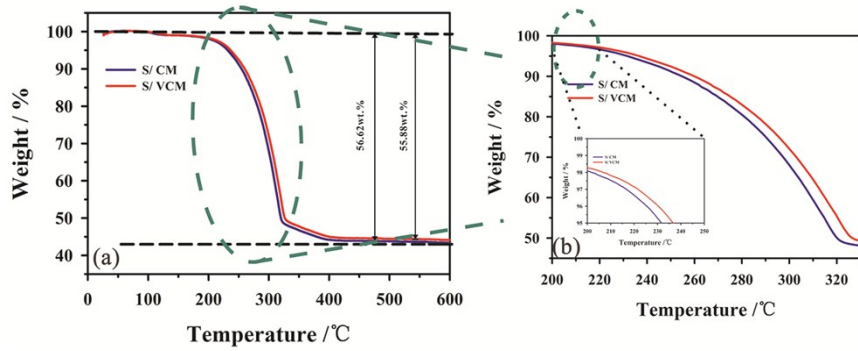

**Fig. S2.** (a) TG curves for the S/CM and S/VCM composites under Ar atmosphere; (b) the enlarged image of (a).

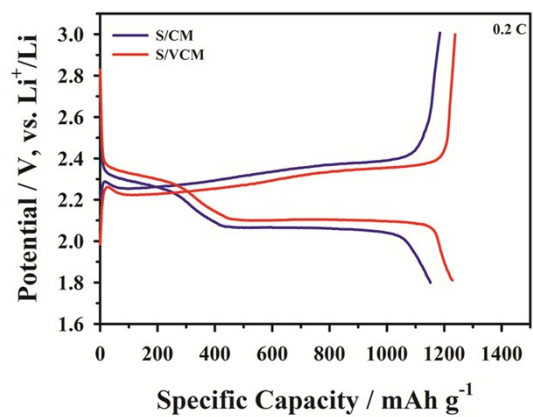

**Fig. S3.** The initial second discharge/charge curves of the S/CM and S/VCM composite cathodes at 0.2 C.

**Table S1.** Pore structure parameters of CM and VCM.

| sample | $S_{\text{BET}}$ ( $\text{m}^2\text{g}^{-1}$ ) | V ( $\text{cm}^3\text{g}^{-1}$ ) |
|--------|------------------------------------------------|----------------------------------|
| CM     | 713.4                                          | 0.816                            |
| VCM    | 698.2                                          | 0.768                            |
